# Supplementary material
Source: HighWire-hosted journal article supplement (https://emj.bmj.com/content/39/5/411)
Supplement: inline-supplementary-material-1 [file inline-supplementary-material-1.pdf]

**Supplementary Table 1** Consumer products with most changes in the number of traumas during the lockdown period compared to the control period in 2019.

|                                                       | Highest decrease in the number of ED visits during control (2019) vs lockdown period (2020)                                                                                                                                                                                                                                                                                                                                                                                                                                                                                                     | Highest increase in the number of ED visits during control (2019) vs lockdown period (2020)                                                                                                                                                                                                                                                                                                                                                                                                                                                                                         |
|-------------------------------------------------------|-------------------------------------------------------------------------------------------------------------------------------------------------------------------------------------------------------------------------------------------------------------------------------------------------------------------------------------------------------------------------------------------------------------------------------------------------------------------------------------------------------------------------------------------------------------------------------------------------|-------------------------------------------------------------------------------------------------------------------------------------------------------------------------------------------------------------------------------------------------------------------------------------------------------------------------------------------------------------------------------------------------------------------------------------------------------------------------------------------------------------------------------------------------------------------------------------|
| <b>Consumer products, change in ED visits (n, Δ%)</b> | 1. Stairs/steps: -49,316 (107,328 vs 58,012, -45.9%)<br>2. Basketball: -39,984 (48,412 vs 8,428, -82.6%)<br>3. Floors/flooring material: -36,292 (136,927 vs 100,635, -26.5%)<br>4. Beds/bedframes: -24,928 (78,011 vs 53,083, -32%)<br>5. Soccer: -23,091 (25,181 vs 2,090, -91.7%)<br>6. Chairs: -15,454 (35,026 vs 19,572, -44.1%)<br>7. Baseball: -15,174 (17,062 vs 1,889, -88.9%)<br>8. Exercise [activity or apparel, without equipment]: -14,418 (32,726 vs 18,309, -44.1%)<br>9. Ceilings/walls: -13,440 (30,696 vs 17,257, -43.8%)<br>10. Football: -12,668 (15,093 vs 2,425, -83.9%) | 1. Saws: +1,112 (745 vs 1,857, +149.3%)<br>2. Lawn mowers: +977 (2,432 vs 3,409, +40.2%)<br>3. All-terrain vehicles: +737 (2,206 vs 2,944, +33.4%)<br>4. House repair/construction materials: +695 (1,358 vs 2,053, +51.1%)<br>5. Power drills: +657 (230 vs 887, +285.7%)<br>6. In-line skating: +637 (827 vs 1,465, +77%)<br>7. Portable power saw: +612 (764 vs 1,377, +80.1%)<br>8. General purpose household cleaners: +607 (945 vs 1,552, +64.3%)<br>9. Water slides [backyard/home]: +467 (5 vs 472, +9,680.9%)<br>10. Riding power lawn mowers: +456 (793 vs 1,250, +57.5%) |

ED, emergency department

The consumer products are reported based on the categories provided by NEISS.
